# Supplementary material for: BUB-1 targets PP2A:B56 to regulate chromosome congression during meiosis I in C. elegans oocytes
Source: eLife. 2020 Dec 23;9:e65307. doi: 10.7554/eLife.65307 (PMC7787666; doi:10.7554/eLife.65307)
Supplement: Supplementary file 2. [file elife-65307-supp2.xlsx]

## Sheet: Sheet1
	Markers / mutants	Strain Number	Genotype	Source
	SUR-6::GFP	OD4579	sur-6(lt183[GFP::loxP::3xFlag::sur-6]) I	this study
	SUR-6::GFP; mCherry::histone	FGP354	sur-6(lt183[GFP::loxP::3xFlag::sur-6])I; ltIs37[pAA64; pie-1p::mCherry::his-58; unc-119 (+)]IV	this study
	GFP::tubulin; mCherry::histone	OD868	ltSi220[pOD1249/pSW077; Pmex-5::GFP::tbb-2::operon_linker::mCHerry::his-11; cb-unc-119(+)]I	Wang et al, 2015 (PMID: 24217623)
	GFP::tubulin; mCherry::histone; bub-1(L282A;V285A)	FGP339	ltSi220[pOD1249/pSW077; Pmex-5::GFP::tbb-2::operon_linker::mCHerry::his-11; cb-unc-119(+)]I; bub-1(syb1936[bub-1((L282A;V285A)])I	this study
	GFP::tubulin; mCherry::histone; pptr-2D	FGP369	pptr-2(ok1467)V; ltSi220[pOD1249/pSW077; Pmex-5::GFP::tbb-2::operon_linker::mCHerry::his-11; cb-unc-119(+)]I	this study
	GFP::tubulin; mCherry::histone; bub-1(K718R;D847N)	FGP337	ltSi220[pOD1249/pSW077; Pmex-5::GFP::tbb-2::operon_linker::mCHerry::his-11; cb-unc-119(+)]I; bub-1(syb1746[bub-1((K718R;D847N)])	this study
	GFP::tubulin; mCherry::histone; bub-1(L282A;V285A;K718R;D847N)	FGP402	ltSi220[pOD1249/pSW077; Pmex-5::GFP::tbb-2::operon_linker::mCHerry::his-11; cb-unc-119(+)]I; bub-1(syb1936,syb2383[bub-1(L282A;V285A,K718R;D847N)]I	this study
	bub-1(S283A); GFP::tubulin; mCherry::histone	FGP500	bub-1(syb2396[bub-1((S283A)])I;ltSi220[pOD1249/pSW077; Pmex-5::GFP::tbb-2::operon_linker::mCHerry::his-11; cb-unc-119(+)]I	this study
	IFY-1::GFP; mCherry::histone	JAB222	ify-1(erb-82[ify-1::linker::GFP])II;ltIs37[pAA64; pie-1p::mCherry::his-58; unc-119 (+)]IV; unc-119(ed3)???	this study
	IFY-1::GFP; mCherry::histone; bub-1(L282A;V285A)	FGP405	ify-1(erb-82[ify-1::linker::GFP])II; ltIs37 [pAA64; pie-1p::mCherry::his-58; unc-119 (+)]IV; unc-119(ed3)???; bub-1(syb1936[bub-1(L282A;V285A)])I	this study
	GFP::MDF-1; mCherry::histone	OD2920	unc-119(ed3)?III; ltIs37[pAA64; pie-1p::mCherry::his-58; unc-119 (+)]IV; mdf-1(lt39[gfp::tev::loxP::3xFlag::mdf-1])V	Kim et al, 2017 (PMID: 28698300)
	GFP::MDF-1; mCherry::histone; bub-1(K718R;D847N)	FGP434	unc-119(ed3)?III; ltIs37[pAA64; pie-1p::mCherry::his-58; unc-119 (+)]IV; mdf-1(lt39[gfp::tev::loxP::3xFlag::mdf-1])V; bub-1(syb1746[bub-1((K718R;D847N)])I	this study
	GFP::MDF-1; mCherry::histone; bub-1(L282A;V285A)	FGP426	unc-119(ed3)?III; ltIs37[pAA64; pie-1p::mCherry::his-58; unc-119 (+)]IV; mdf-1(lt39[gfp::tev::loxP::3xFlag::mdf-1])V; bub-1(syb1936[bub-1(L282A;V285A)])I	this study
	GFP::PAA-1; mCherry::histone	FGP438	paa-1(syb2267[GFP::linker::paa-1]III; ltIs37[pAA64; pie-1p::mCherry::his-58; unc-119 (+)]IV	this study
	GFP::PAA-1; mCherry::histone; bub-1(L282A;V285A)	FGP388	paa-1(syb2267[GFP::linker::paa-1]III; ltIs37 [pAA64; pie-1p::mCherry::his-58; unc-119 (+)]IV; bub-1(syb1936[bub-1((L282A;V285A)])I	this study
	GFP::PAA-1; mCherry::histone; bub-1(K718R;D847N)	FGP413	paa-1(syb2267[GFP::linker::paa-1]III; ltIs37 [pAA64; pie-1/mCHERRY::his-58; unc-119 (+)]IV; bub-1(syb1746[bub-1((K718R;D847N)])I	this study
	GFP::PAA-1; mCherry::histone; bub-1(L282A;V285A;K718R;D847N)	FGP443	paa-1(syb2267[GFP::linker::paa-1]III; ltIs37 [pAA64; pie-1/mCHERRY::his-58; unc-119 (+)]IV; bub-1(syb1936,syb2383[bub-1(L282A;V285A,K718R;D847N)]I	this study
	GFP::PAA-1; mCherry::histone; bub-1(S283A)	FGP445	paa-1(syb2267[GFP::linker::paa-1]III; ltIs37 [pAA64; pie-1/mCHERRY::his-58; unc-119 (+)]IV; bub-1(syb1936,syb2383[bub-1(bub-1(syb2396[bub-1((S283A)])I)]I	this study
	GFP::PAA-1; mCherry::histone; pptr-2Δ	FGP387	paa-1(syb2267[GFP::linker::paa-1]III; ltIs37 [pAA64; pie-1/mCHERRY::his-58; unc-119 (+)]IV; pptr-2(ok1467)V	this study
	PPTR-1::GFP	OD3600	pptr-1(lt89[pptr-1::gfp])V	Kim et al, 2017 (PMID: 28698300)
	PPTR-1::GFP; mCherry::histone	FGP344	pptr-1(lt89[pptr-1::gfp])V; ltIs37 [pAA64; pie-1p::mCherry::his-58; unc-119 (+)]IV	this study
	PPTR-1::GFP; mCherry::histone; bub-1(K718R;D847N)	FGP349	pptr-1(lt89[pptr-1::gfp])V; ltIs37 [pAA64; pie-1p::mCherry::his-58; unc-119 (+)]IV; bub-1(syb1746[bub-1((K718R;D847N)])I	this study
	PPTR-1::GFP; mCherry::histone; bub-1(L282A;V285A)	FGP350	pptr-1(lt89[pptr-1::gfp])V; ltIs37 [pAA64; pie-1p::mCherry::his-58; unc-119 (+)]IV; bub-1(syb1936[bub-1((L282A;V285A)])I	this study
	PPTR-1::GFP; mCherry::histone; san-1Δ	FGP379	pptr-1(lt89[pptr-1::gfp])V;ltIs37 [pAA64; pie-1p::mCherry::his-58; unc-119 (+)]IV; san-1(ok1580) I	this study
	PPTR-1::GFP; mCherry::histone; bub-1(L282A;V285A;K718R;D847N)	FGP400	pptr-1(lt89[pptr-1::gfp])V; bub-1(syb1936,syb2383[bub-1(L282A;V285A,K718R;D847N)]I	this study
	PPTR-1::GFP; mCherry::histone; bub-1(S283A)	FGP441	pptr-1(lt89[pptr-1::gfp])V; ltIs37 [pAA64; pie-1/mCHERRY::his-58; unc-119 (+)]IV; bub-1(syb2396[bub-1((S283A)])I	this study
	PPTR-2::GFP	OD3424	pptr-2(lt91[pptr-2::gfp])V	Kim et al, 2017 (PMID: 28698300)
	PPTR-2::GFP; mCherry::histone	FGP317	pptr-2(lt91[pptr-2::gfp])V; ltIs37[pAA64; pie-1p::mCherry::his-58; unc-119 (+)]IV	this study
	PPTR-2::GFP; mCherry::histone; bub-1(K718R;D847N)	FGP323	pptr-2(lt91[pptr-2::gfp])V; ltIs37[pAA64; pie-1p::mCherry::his-58; unc-119 (+)]IV; bub-1(syb1746[bub-1((K718R;D847N)])I	this study
	PPTR-2::GFP; mCherry::histone; bub-1(L282A;V285A)	FGP324	pptr-2(lt91[pptr-2::gfp])V; ltIs37[pAA64; pie-1p::mCherry::his-58; unc-119 (+)]IV; bub-1(syb1936[bub-1((L282A;V285A)])I	this study
	PPTR-2::GFP; mCherry::histone; san-1Δ	FGP380	pptr-2(lt91[pptr-2::gfp])V; ltIs37[pAA64; pie-1p::mCherry::his-58; unc-119 (+)]IV; san-1(ok1580) I	this study
	PPTR-2::GFP; mCherry::histone; bub-1(L282A;V285A;K718R;D847N)	FGP398	pptr-2(lt91[pptr-2::gfp])V; bub-1(syb1936,syb2383[bub-1(L282A;V285A,K718R;D847N)]I	this study
	PPTR-2::GFP; mCherry::histone; bub-1(S283A)	FGP447	pptr-2(lt91[pptr-2::gfp])V; ltIs37 [pAA64; pie-1/mCHERRY::his-58; unc-119 (+)]IV; bub-1(syb2396[bub-1((S283A)])I	this study
	GFP::ASPM-1; mCherry::histone	EU2876	or1935[GFP::aspm-1] I; itIs37[pie-1p::mCherry::H2B::pie-1 3′UTR + unc-119(+)] IV	Connolly AA, et al. J (PMID: 26370499)
	PPTR-2::GFP; mCherry::histone	FGP477	pptr-2(lt91[pptr-2::gfp])V; bqSi189[lmn-1p::mCherry::his-58 + unc-119(+)]II	this study
	PPTR-2::GFP; mCherry::histone; sgo-1Δ	FGP478	pptr-2(lt91[pptr-2::gfp])V; bqSi189[lmn-1p::mCherry::his-58 + unc-119(+)]II; sgo-1(fq48)IV	this study
	PPTR-1::GFP; mCherry::histone	FGP479	pptr-1(lt89[pptr-1::gfp])V; bqSi189[lmn-1p::mCherry::his-58 + unc-119(+)]II	this study
	PPTR-1::GFP; mCherry::histone; sgo-1Δ	FGP480	pptr-1(lt89[pptr-1::gfp])V; bqSi189[lmn-1p::mCherry::his-58 + unc-119(+)]II; sgo-1(fq48)IV	this study
